# Supplementary material
Source: Springer Nature journal article supplement (https://www.springermedizin.de/resource/supplementary/13054_2009_8363_MOESM4_ESM.pdf/9731796)

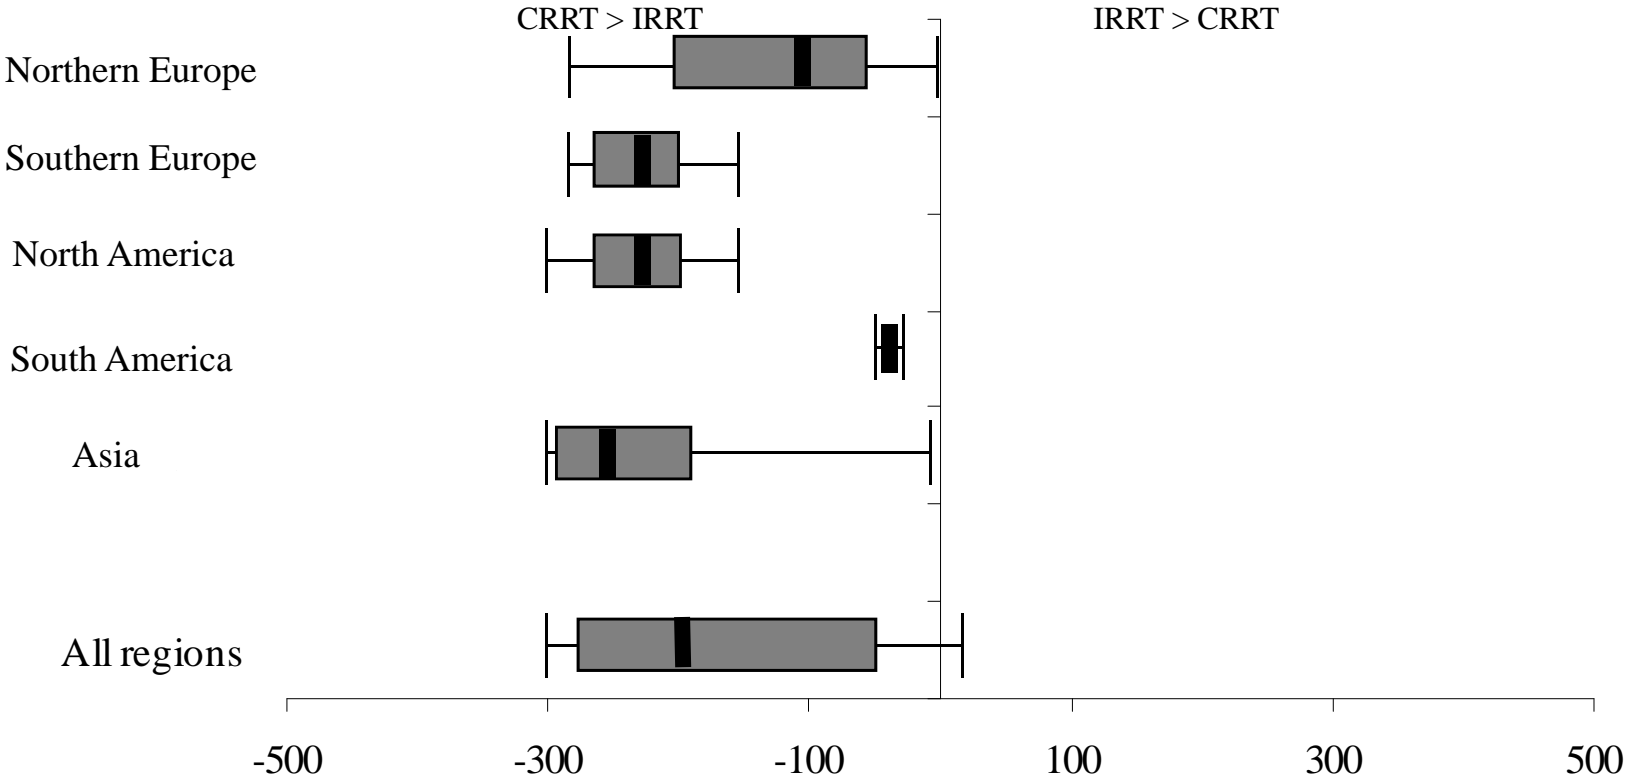

Supplement: MOESM4 [file 9731796]
